# Supplementary material for: Hepatitis B Virus Protein X Induces Degradation of Talin-1
Source: MDPI journal article supplement (doi:10.3390/v8100281), 2016-10-19
Supplement: s1 [file s1]

# **Supplementary Materials: Hepatitis B Virus Protein X Induces Degradation of Talin-1**

**Maarten A. A. van de Klundert, Maartje van den Biggelaar, Neeltje A. Kootstra  
and Hans L. Zaaijer**

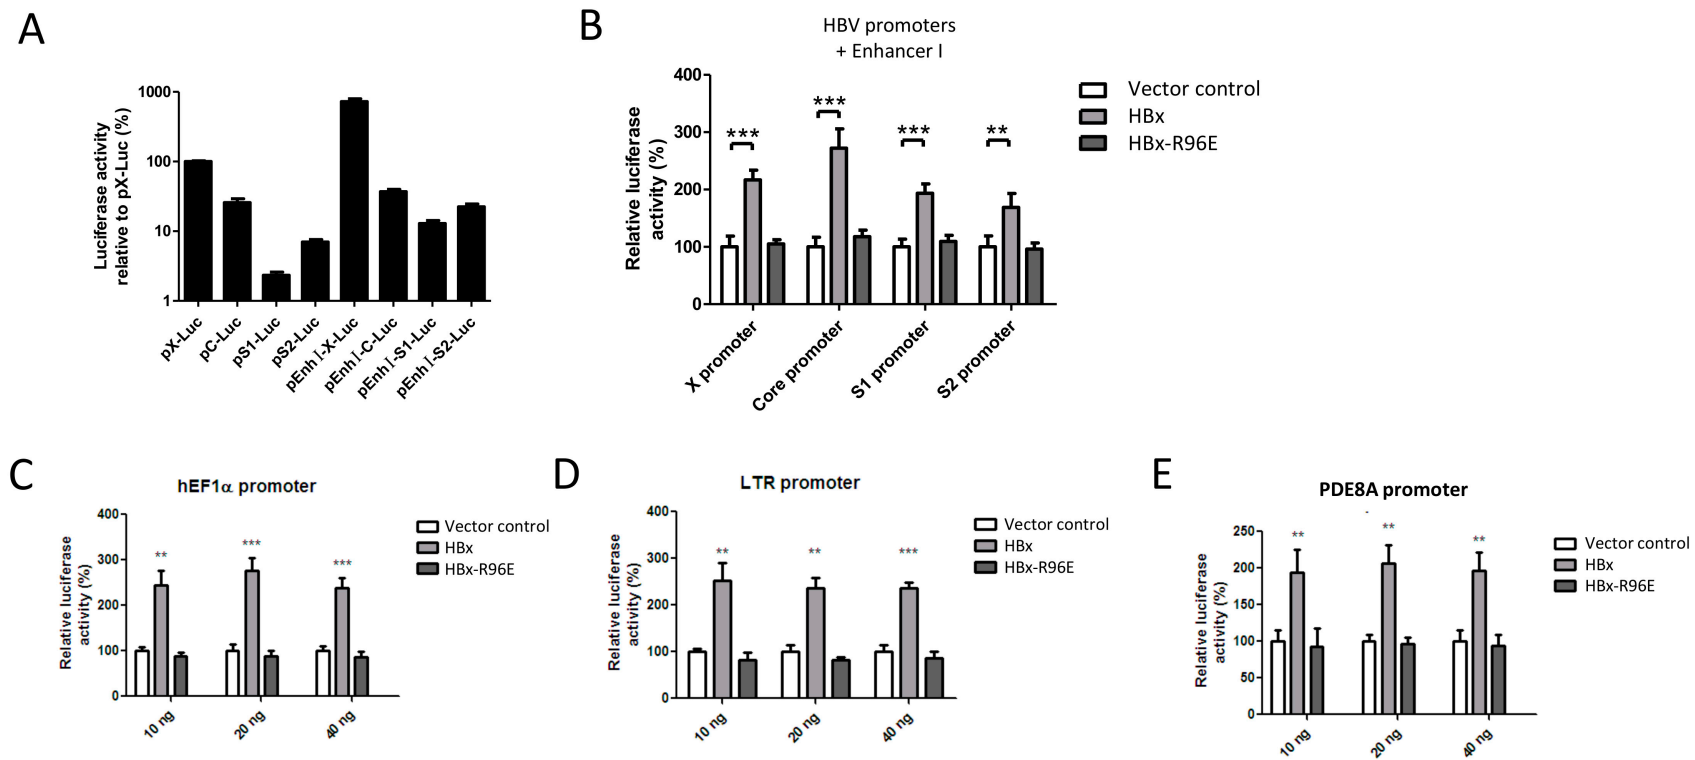

**Figure S1.** Transcriptional transactivation by hepatitis B virus (HBV) accessory protein X (HBx). **(A)** Basal activity of luciferase reporters under control of the HBV promoters in vectors in the absence and presence of the HBV enhancer I (EnhI) 48 h after transfection in HEK 293 cells. **(B)** Activity of the different HBV promoters in presence enhancer I 48 h after cotransfection with HBx- or HBx-R96E-expressing constructs. **(C–E)** Activity of the luciferase reporters under control of the HIV-1 LTR (LTR), the human elongation factor 1 $\alpha$  (hEF1 $\alpha$ ), or the phosphodiesterase 8A (PDE8A) promoters, respectively, 48 h after cotransfection with HBx- or HBx-R96E-expressing constructs in HEK 293 cells. \*\*  $p < 0.01$ , \*\*\*  $p < 0.001$ .

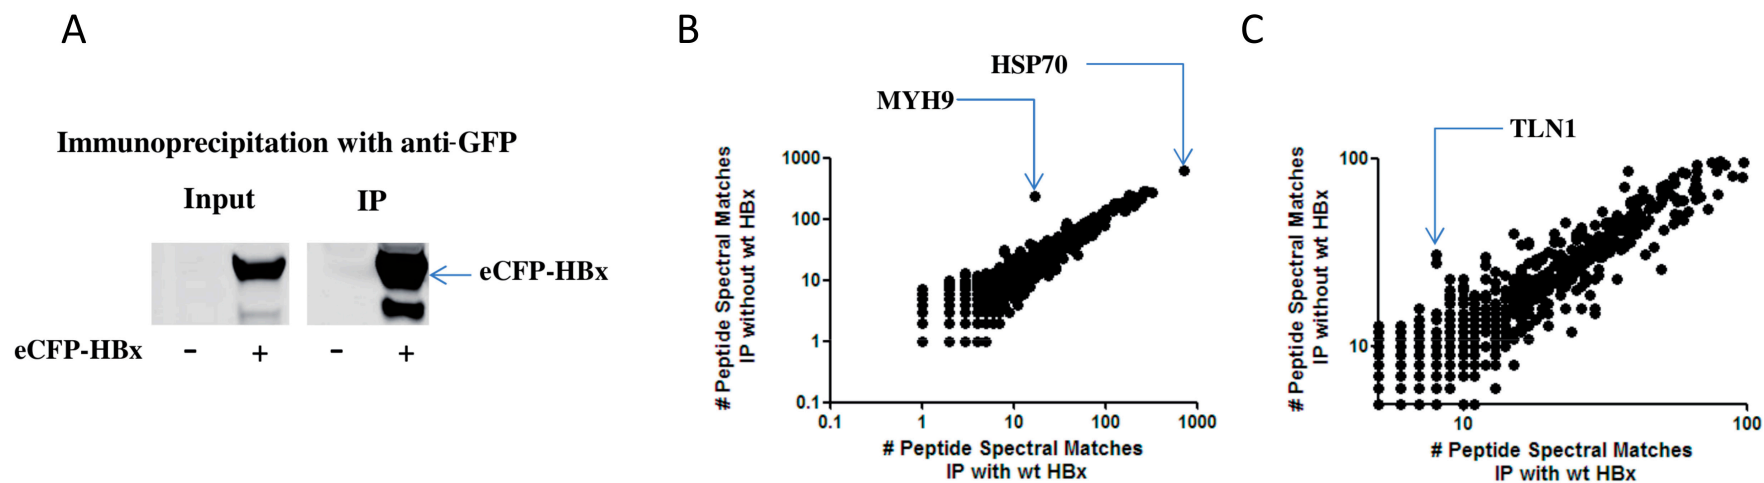

**Figure S2.** Immunoblot control and peptide spectral matches of HBx-interacting proteins. **(A)** Western blot analysis of eCFP-HBx in HEK 293 cells transfected with an eCFP-HBx expression vector before and after immunoprecipitation (IP) with anti-green fluorescent protein (GFP). **(B,C)** The number of peptide spectral matches identified in the immunoprecipitation in the absence of wild-type (wt) HBx is plotted versus the number of peptide spectral matches in the immunoprecipitation in the presence of wild-type HBx based on Proteome Discoverer analysis of mass spectrometry data.

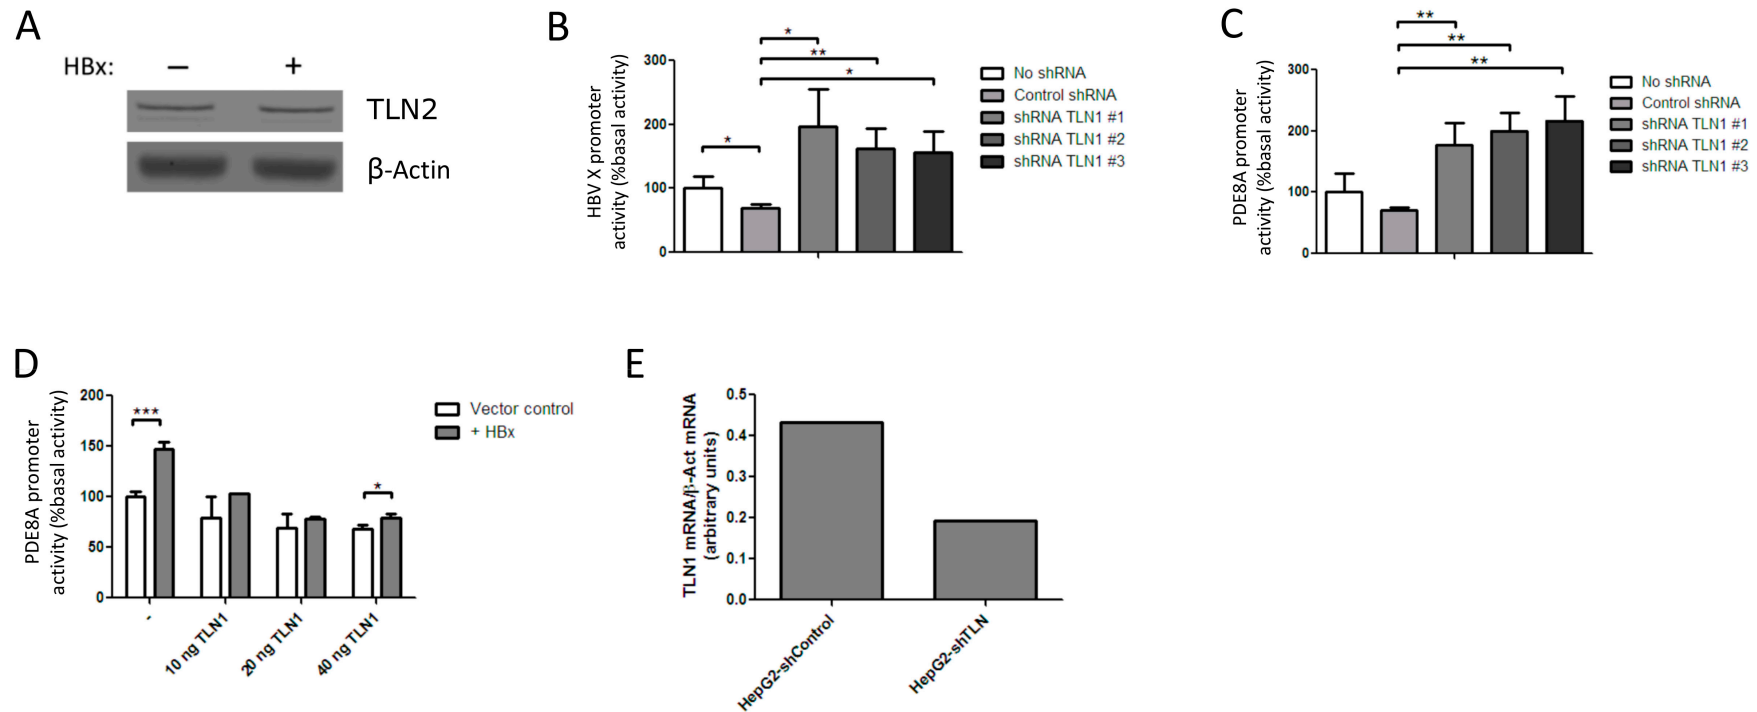

**Figure S3.** Talin-1 (TLN1) suppresses transcription and is specifically degraded in the presence of HBx. **(A)** Western blot analysis of TLN2, showing TLN2 levels were not affected by HBx expression; **(B,C)** HEK 293 cells were transfected with luciferase reporters under control of the HBV X- and human PDE8A promoters, and cotransfected with the plasmids expressing short hairpin RNAs (shRNAs) against TLN1, showing that TLN1 knockdown efficiently transactivates transcription. **(D)** Cotransfection of a vector expressing a biologically active GFP-TLN1 fusion protein with a luciferase reporter under control of the PDE8A promoter prevented transactivation by HBx in a dose-dependent manner. **(E)** TLN1 mRNA was reduced by 55% in HepG2 cells 48 h after transduction with the lentivirus expressing shRNA against TLN1 as measured by the ratio of TLN1 mRNA/ $\beta$ -actin (Act) mRNA. \*  $p < 0.05$ , \*\*  $p < 0.01$ , \*\*\*  $p < 0.001$ .

**Table S1.** Protein groups identified in the immunoprecipitation experiments based on mass spectrometry data analysed by MaxQuant.

**Table S2.** Protein groups identified in the immunoprecipitation experiments based on mass spectrometry data analysed by Proteome Discoverer.
